# Supplementary material for: Integrated proteomics and metabolomics analysis of D-pinitol function during hippocampal damage in streptozocin-induced aging-accelerated mice
Source: Front Mol Neurosci. 2023 Oct 30;16:1251513. doi: 10.3389/fnmol.2023.1251513 (PMC10664147; doi:10.3389/fnmol.2023.1251513)
Supplement: Supplementary file 4 [file Data_Sheet_3.xlsx]

## Sheet: KEGG
ID	Description	MetaboRatio	BgRatio	pvalue	p.adjust	qvalue	KEGGID	Count	KEGGID(LOG2FC)	RichFactor	URL	SecondClass	TopClass
mmu04977	Vitamin digestion and absorption	4/42	39/4294	0.000507652	0.0314744	0.0251154	C05443/C00864/C00250/C00255	4	C05443/C00864/C00250/C00255	10.49	https://www.kegg.jp/kegg-bin/show_pathway?map=mmu04977&multi_query=cpd:C05443+purple%0d%0acpd:C00864+purple%0d%0acpd:C00250+purple%0d%0acpd:C00255+purple	Digestive system	Organismal Systems
mmu01230	Biosynthesis of amino acids	6/42	128/4294	0.00135574	0.0420279	0.0335367	C00019/C00062/C03406/C01005/C00158/C00449	6	C00019/C00062/C03406/C01005/C00158/C00449	4.79	https://www.kegg.jp/kegg-bin/show_pathway?map=mmu01230&multi_query=cpd:C00019+purple%0d%0acpd:C00062+purple%0d%0acpd:C03406+purple%0d%0acpd:C01005+purple%0d%0acpd:C00158+purple%0d%0acpd:C00449+purple	Global and overview maps	Metabolism
mmu00240	Pyrimidine metabolism	4/42	65/4294	0.00347695	0.0449274	0.0358504	C00178/C00295/C00105/C00383	4	C00178/C00295/C00105/C00383	6.29	https://www.kegg.jp/kegg-bin/show_pathway?map=mmu00240&multi_query=cpd:C00178+purple%0d%0acpd:C00295+purple%0d%0acpd:C00105+purple%0d%0acpd:C00383+purple	Nucleotide metabolism	Metabolism
mmu00410	beta-Alanine metabolism	3/42	32/4294	0.00354394	0.0449274	0.0358504	C00864/C00386/C00383	3	C00864/C00386/C00383	9.58	https://www.kegg.jp/kegg-bin/show_pathway?map=mmu00410&multi_query=cpd:C00864+purple%0d%0acpd:C00386+purple%0d%0acpd:C00383+purple	Metabolism of other amino acids	Metabolism
mmu01240	Biosynthesis of cofactors	9/42	327/4294	0.00362318	0.0449274	0.0358504	C00019/C00275/C00864/C00250/C00295/C00255/C00105/C00130/C00158	9	C00019/C00275/C00864/C00250/C00295/C00255/C00105/C00130/C00158	2.81	https://www.kegg.jp/kegg-bin/show_pathway?map=mmu01240&multi_query=cpd:C00019+purple%0d%0acpd:C00275+purple%0d%0acpd:C00864+purple%0d%0acpd:C00250+purple%0d%0acpd:C00295+purple%0d%0acpd:C00255+purple%0d%0acpd:C00105+purple%0d%0acpd:C00130+purple%0d%0acpd:C00158+purple	Global and overview maps	Metabolism
mmu00310	Lysine degradation	3/42	50/4294	0.0123987	0.123027	0.0981708	C00164/C00487/C00449	3	C00164/C00487/C00449	6.13	https://www.kegg.jp/kegg-bin/show_pathway?map=mmu00310&multi_query=cpd:C00164+purple%0d%0acpd:C00487+purple%0d%0acpd:C00449+purple	Amino acid metabolism	Metabolism
mmu00020	Citrate cycle (TCA cycle)	2/42	20/4294	0.0158744	0.123027	0.0981708	C00417/C00158	2	C00417/C00158	10.22	https://www.kegg.jp/kegg-bin/show_pathway?map=mmu00020&multi_query=cpd:C00417+purple%0d%0acpd:C00158+purple	Carbohydrate metabolism	Metabolism
mmu00740	Riboflavin metabolism	2/42	20/4294	0.0158744	0.123027	0.0981708	C01727/C00255	2	C01727/C00255	10.22	https://www.kegg.jp/kegg-bin/show_pathway?map=mmu00740&multi_query=cpd:C01727+purple%0d%0acpd:C00255+purple	Metabolism of cofactors and vitamins	Metabolism
mmu00220	Arginine biosynthesis	2/42	23/4294	0.0207511	0.142952	0.11407	C00062/C03406	2	C00062/C03406	8.89	https://www.kegg.jp/kegg-bin/show_pathway?map=mmu00220&multi_query=cpd:C00062+purple%0d%0acpd:C03406+purple	Amino acid metabolism	Metabolism
mmu05323	Rheumatoid arthritis	1/42	3/4294	0.0290639	0.169462	0.135224	C05443	1	C05443	34.08	https://www.kegg.jp/kegg-bin/show_pathway?map=mmu05323&multi_query=cpd:C05443+purple	Immune disease	Human Diseases
mmu00250	Alanine, aspartate and glutamate metabolism	2/42	28/4294	0.0300659	0.169462	0.135224	C03406/C00158	2	C03406/C00158	7.3	https://www.kegg.jp/kegg-bin/show_pathway?map=mmu00250&multi_query=cpd:C03406+purple%0d%0acpd:C00158+purple	Amino acid metabolism	Metabolism
mmu04742	Taste transduction	2/42	32/4294	0.0384968	0.170798	0.136291	C00130/C00158	2	C00130/C00158	6.39	https://www.kegg.jp/kegg-bin/show_pathway?map=mmu04742&multi_query=cpd:C00130+purple%0d%0acpd:C00158+purple	Sensory system	Organismal Systems
mmu04142	Lysosome	1/42	4/4294	0.0385674	0.170798	0.136291	C00275	1	C00275	25.56	https://www.kegg.jp/kegg-bin/show_pathway?map=mmu04142&multi_query=cpd:C00275+purple	Transport and catabolism	Cellular Processes
mmu04150	mTOR signaling pathway	1/42	4/4294	0.0385674	0.170798	0.136291	C00062	1	C00062	25.56	https://www.kegg.jp/kegg-bin/show_pathway?map=mmu04150&multi_query=cpd:C00062+purple	Signal transduction	Environmental Information Processing
mmu02010	ABC transporters	4/42	138/4294	0.0445098	0.183974	0.146804	C00062/C00255/C00487/C00392	4	C00062/C00255/C00487/C00392	2.96	https://www.kegg.jp/kegg-bin/show_pathway?map=mmu02010&multi_query=cpd:C00062+purple%0d%0acpd:C00255+purple%0d%0acpd:C00487+purple%0d%0acpd:C00392+purple	Membrane transport	Environmental Information Processing
mmu05230	Central carbon metabolism in cancer	2/42	37/4294	0.0501369	0.19428	0.155029	C00062/C00158	2	C00062/C00158	5.53	https://www.kegg.jp/kegg-bin/show_pathway?map=mmu05230&multi_query=cpd:C00062+purple%0d%0acpd:C00158+purple	Cancer: overview	Human Diseases
mmu05142	Chagas disease	1/42	6/4294	0.0573026	0.208986	0.166763	C00062	1	C00062	17.04	https://www.kegg.jp/kegg-bin/show_pathway?map=mmu05142&multi_query=cpd:C00062+purple	Infectious disease: parasitic	Human Diseases
mmu00340	Histidine metabolism	2/42	47/4294	0.0765817	0.24465	0.195222	C00386/C01152	2	C00386/C01152	4.35	https://www.kegg.jp/kegg-bin/show_pathway?map=mmu00340&multi_query=cpd:C00386+purple%0d%0acpd:C01152+purple	Amino acid metabolism	Metabolism
mmu04974	Protein digestion and absorption	2/42	47/4294	0.0765817	0.24465	0.195222	C00062/C00163	2	C00062/C00163	4.35	https://www.kegg.jp/kegg-bin/show_pathway?map=mmu04974&multi_query=cpd:C00062+purple%0d%0acpd:C00163+purple	Digestive system	Organismal Systems
mmu04713	Circadian entrainment	1/42	9/4294	0.0847391	0.24465	0.195222	C01598	1	C01598	11.36	https://www.kegg.jp/kegg-bin/show_pathway?map=mmu04713&multi_query=cpd:C01598+purple	Environmental adaptation	Organismal Systems
mmu00970	Aminoacyl-tRNA biosynthesis	2/42	52/4294	0.0911421	0.24465	0.195222	C00062/C01005	2	C00062/C01005	3.93	https://www.kegg.jp/kegg-bin/show_pathway?map=mmu00970&multi_query=cpd:C00062+purple%0d%0acpd:C01005+purple	Translation	Genetic Information Processing
mmu00051	Fructose and mannose metabolism	2/42	54/4294	0.0971804	0.24465	0.195222	C00275/C00392	2	C00275/C00392	3.79	https://www.kegg.jp/kegg-bin/show_pathway?map=mmu00051&multi_query=cpd:C00275+purple%0d%0acpd:C00392+purple	Carbohydrate metabolism	Metabolism
mmu00760	Nicotinate and nicotinamide metabolism	2/42	55/4294	0.100242	0.24465	0.195222	C01004/C00163	2	C01004/C00163	3.72	https://www.kegg.jp/kegg-bin/show_pathway?map=mmu00760&multi_query=cpd:C01004+purple%0d%0acpd:C00163+purple	Metabolism of cofactors and vitamins	Metabolism
mmu00472	D-Arginine and D-ornithine metabolism	1/42	11/4294	0.102595	0.24465	0.195222	C00062	1	C00062	9.29	https://www.kegg.jp/kegg-bin/show_pathway?map=mmu00472&multi_query=cpd:C00062+purple	Metabolism of other amino acids	Metabolism
mmu04020	Calcium signaling pathway	1/42	11/4294	0.102595	0.24465	0.195222	C00004	1	C00004	9.29	https://www.kegg.jp/kegg-bin/show_pathway?map=mmu04020&multi_query=cpd:C00004+purple	Signal transduction	Environmental Information Processing
mmu04122	Sulfur relay system	1/42	11/4294	0.102595	0.24465	0.195222	C00019	1	C00019	9.29	https://www.kegg.jp/kegg-bin/show_pathway?map=mmu04122&multi_query=cpd:C00019+purple	Folding, sorting and degradation	Genetic Information Processing
mmu00100	Steroid biosynthesis	2/42	58/4294	0.109588	0.251646	0.200804	C05443/C01753	2	C05443/C01753	3.53	https://www.kegg.jp/kegg-bin/show_pathway?map=mmu00100&multi_query=cpd:C05443+purple%0d%0acpd:C01753+purple	Lipid metabolism	Metabolism
mmu05146	Amoebiasis	1/42	13/4294	0.120111	0.257863	0.205765	C00062	1	C00062	7.86	https://www.kegg.jp/kegg-bin/show_pathway?map=mmu05146&multi_query=cpd:C00062+purple	Infectious disease: parasitic	Human Diseases
mmu00630	Glyoxylate and dicarboxylate metabolism	2/42	62/4294	0.122394	0.257863	0.205765	C00417/C00158	2	C00417/C00158	3.3	https://www.kegg.jp/kegg-bin/show_pathway?map=mmu00630&multi_query=cpd:C00417+purple%0d%0acpd:C00158+purple	Carbohydrate metabolism	Metabolism
mmu05014	Amyotrophic lateral sclerosis	1/42	14/4294	0.128744	0.257863	0.205765	C00062	1	C00062	7.3	https://www.kegg.jp/kegg-bin/show_pathway?map=mmu05014&multi_query=cpd:C00062+purple	Neurodegenerative disease	Human Diseases
mmu00270	Cysteine and methionine metabolism	2/42	64/4294	0.128932	0.257863	0.205765	C00019/C01005	2	C00019/C01005	3.19	https://www.kegg.jp/kegg-bin/show_pathway?map=mmu00270&multi_query=cpd:C00019+purple%0d%0acpd:C01005+purple	Amino acid metabolism	Metabolism
mmu01210	2-Oxocarboxylic acid metabolism	3/42	134/4294	0.141949	0.273854	0.218526	C08417/C00417/C00158	3	C08417/C00417/C00158	2.29	https://www.kegg.jp/kegg-bin/show_pathway?map=mmu01210&multi_query=cpd:C08417+purple%0d%0acpd:C00417+purple%0d%0acpd:C00158+purple	Global and overview maps	Metabolism
mmu00190	Oxidative phosphorylation	1/42	16/4294	0.145761	0.273854	0.218526	C00004	1	C00004	6.39	https://www.kegg.jp/kegg-bin/show_pathway?map=mmu00190&multi_query=cpd:C00004+purple	Energy metabolism	Metabolism
mmu01523	Antifolate resistance	1/42	17/4294	0.154148	0.281093	0.224302	C00130	1	C00130	6.01	https://www.kegg.jp/kegg-bin/show_pathway?map=mmu01523&multi_query=cpd:C00130+purple	Drug resistance: antineoplastic	Human Diseases
mmu00330	Arginine and proline metabolism	2/42	78/4294	0.176704	0.313018	0.249777	C00019/C00062	2	C00019/C00062	2.62	https://www.kegg.jp/kegg-bin/show_pathway?map=mmu00330&multi_query=cpd:C00019+purple%0d%0acpd:C00062+purple	Amino acid metabolism	Metabolism
mmu00232	Caffeine metabolism	1/42	22/4294	0.19489	0.317979	0.253735	C07480	1	C07480	4.65	https://www.kegg.jp/kegg-bin/show_pathway?map=mmu00232&multi_query=cpd:C07480+purple	Biosynthesis of other secondary metabolites	Metabolism
mmu04152	AMPK signaling pathway	1/42	22/4294	0.19489	0.317979	0.253735	C09731	1	C09731	4.65	https://www.kegg.jp/kegg-bin/show_pathway?map=mmu04152&multi_query=cpd:C09731+purple	Signal transduction	Environmental Information Processing
mmu04925	Aldosterone synthesis and secretion	1/42	22/4294	0.19489	0.317979	0.253735	C00004	1	C00004	4.65	https://www.kegg.jp/kegg-bin/show_pathway?map=mmu04925&multi_query=cpd:C00004+purple	Endocrine system	Organismal Systems
mmu04714	Thermogenesis	1/42	23/4294	0.202805	0.322409	0.25727	C00004	1	C00004	4.45	https://www.kegg.jp/kegg-bin/show_pathway?map=mmu04714&multi_query=cpd:C00004+purple	Environmental adaptation	Organismal Systems
mmu04922	Glucagon signaling pathway	1/42	26/4294	0.226099	0.350453	0.279648	C00158	1	C00158	3.93	https://www.kegg.jp/kegg-bin/show_pathway?map=mmu04922&multi_query=cpd:C00158+purple	Endocrine system	Organismal Systems
mmu04973	Carbohydrate digestion and absorption	1/42	27/4294	0.233714	0.350946	0.280042	C00163	1	C00163	3.79	https://www.kegg.jp/kegg-bin/show_pathway?map=mmu04973&multi_query=cpd:C00163+purple	Digestive system	Organismal Systems
mmu00230	Purine metabolism	2/42	95/4294	0.237738	0.350946	0.280042	C00130/C00362	2	C00130/C00362	2.15	https://www.kegg.jp/kegg-bin/show_pathway?map=mmu00230&multi_query=cpd:C00130+purple%0d%0acpd:C00362+purple	Nucleotide metabolism	Metabolism
mmu00750	Vitamin B6 metabolism	1/42	29/4294	0.248727	0.358629	0.286173	C00250	1	C00250	3.53	https://www.kegg.jp/kegg-bin/show_pathway?map=mmu00750&multi_query=cpd:C00250+purple	Metabolism of cofactors and vitamins	Metabolism
mmu00770	Pantothenate and CoA biosynthesis	1/42	30/4294	0.256125	0.360904	0.287988	C00864	1	C00864	3.41	https://www.kegg.jp/kegg-bin/show_pathway?map=mmu00770&multi_query=cpd:C00864+purple	Metabolism of cofactors and vitamins	Metabolism
mmu05022	Pathways of neurodegeneration - multiple diseases	1/42	32/4294	0.270709	0.372977	0.297621	C00062	1	C00062	3.19	https://www.kegg.jp/kegg-bin/show_pathway?map=mmu05022&multi_query=cpd:C00062+purple	Neurodegenerative disease	Human Diseases
mmu04750	Inflammatory mediator regulation of TRP channels	1/42	35/4294	0.292063	0.393649	0.314118	C00903	1	C00903	2.92	https://www.kegg.jp/kegg-bin/show_pathway?map=mmu04750&multi_query=cpd:C00903+purple	Sensory system	Organismal Systems
mmu01200	Carbon metabolism	2/42	114/4294	0.307184	0.40404	0.322409	C01005/C00158	2	C01005/C00158	1.79	https://www.kegg.jp/kegg-bin/show_pathway?map=mmu01200&multi_query=cpd:C01005+purple%0d%0acpd:C00158+purple	Global and overview maps	Metabolism
mmu00480	Glutathione metabolism	1/42	38/4294	0.312805	0.40404	0.322409	C01879	1	C01879	2.69	https://www.kegg.jp/kegg-bin/show_pathway?map=mmu00480&multi_query=cpd:C01879+purple	Metabolism of other amino acids	Metabolism
mmu00640	Propanoate metabolism	1/42	40/4294	0.326303	0.412776	0.32938	C00163	1	C00163	2.56	https://www.kegg.jp/kegg-bin/show_pathway?map=mmu00640&multi_query=cpd:C00163+purple	Carbohydrate metabolism	Metabolism
mmu01212	Fatty acid metabolism	2/42	122/4294	0.336237	0.412776	0.32938	C02990/C00383	2	C02990/C00383	1.68	https://www.kegg.jp/kegg-bin/show_pathway?map=mmu01212&multi_query=cpd:C02990+purple%0d%0acpd:C00383+purple	Global and overview maps	Metabolism
mmu00280	Valine, leucine and isoleucine degradation	1/42	42/4294	0.339542	0.412776	0.32938	C00164	1	C00164	2.43	https://www.kegg.jp/kegg-bin/show_pathway?map=mmu00280&multi_query=cpd:C00164+purple	Amino acid metabolism	Metabolism
mmu00650	Butanoate metabolism	1/42	47/4294	0.371538	0.442987	0.353487	C00164	1	C00164	2.18	https://www.kegg.jp/kegg-bin/show_pathway?map=mmu00650&multi_query=cpd:C00164+purple	Carbohydrate metabolism	Metabolism
mmu00071	Fatty acid degradation	1/42	50/4294	0.390003	0.447782	0.357313	C02990	1	C02990	2.04	https://www.kegg.jp/kegg-bin/show_pathway?map=mmu00071&multi_query=cpd:C02990+purple	Lipid metabolism	Metabolism
mmu00260	Glycine, serine and threonine metabolism	1/42	50/4294	0.390003	0.447782	0.357313	C01005	1	C01005	2.04	https://www.kegg.jp/kegg-bin/show_pathway?map=mmu00260&multi_query=cpd:C01005+purple	Amino acid metabolism	Metabolism
mmu04080	Neuroactive ligand-receptor interaction	1/42	52/4294	0.402018	0.453184	0.361624	C01598	1	C01598	1.97	https://www.kegg.jp/kegg-bin/show_pathway?map=mmu04080&multi_query=cpd:C01598+purple	Signaling molecules and interaction	Environmental Information Processing
mmu05208	Chemical carcinogenesis - reactive oxygen species	1/42	57/4294	0.431055	0.475001	0.379033	C00019	1	C00019	1.79	https://www.kegg.jp/kegg-bin/show_pathway?map=mmu05208&multi_query=cpd:C00019+purple	Cancer: overview	Human Diseases
mmu00061	Fatty acid biosynthesis	1/42	58/4294	0.436694	0.475001	0.379033	C00383	1	C00383	1.76	https://www.kegg.jp/kegg-bin/show_pathway?map=mmu00061&multi_query=cpd:C00383+purple	Lipid metabolism	Metabolism
mmu00350	Tyrosine metabolism	1/42	78/4294	0.538685	0.575835	0.459495	C00164	1	C00164	1.31	https://www.kegg.jp/kegg-bin/show_pathway?map=mmu00350&multi_query=cpd:C00164+purple	Amino acid metabolism	Metabolism
mmu00380	Tryptophan metabolism	1/42	83/4294	0.56122	0.589757	0.470604	C01598	1	C01598	1.23	https://www.kegg.jp/kegg-bin/show_pathway?map=mmu00380&multi_query=cpd:C01598+purple	Amino acid metabolism	Metabolism
mmu04976	Bile secretion	1/42	97/4294	0.618754	0.639379	0.510201	C01443	1	C01443	1.05	https://www.kegg.jp/kegg-bin/show_pathway?map=mmu04976&multi_query=cpd:C01443+purple	Digestive system	Organismal Systems
mmu00520	Amino sugar and nucleotide sugar metabolism	1/42	116/4294	0.6852	0.696433	0.555727	C00275	1	C00275	0.88	https://www.kegg.jp/kegg-bin/show_pathway?map=mmu00520&multi_query=cpd:C00275+purple	Carbohydrate metabolism	Metabolism
mmu00980	Metabolism of xenobiotics by cytochrome P450	1/42	121/4294	0.700715	0.700715	0.559144	C11714	1	C11714	0.84	https://www.kegg.jp/kegg-bin/show_pathway?map=mmu00980&multi_query=cpd:C11714+purple	Xenobiotics biodegradation and metabolism	Metabolism
