# Supplementary material for: Integrated proteomics and metabolomics analysis of D-pinitol function during hippocampal damage in streptozocin-induced aging-accelerated mice
Source: Front Mol Neurosci. 2023 Oct 30;16:1251513. doi: 10.3389/fnmol.2023.1251513 (PMC10664147; doi:10.3389/fnmol.2023.1251513)
Supplement: Supplementary file 5 [file Data_Sheet_4.xlsx]

## Sheet: KEGG
ID	Description	MetaboRatio	BgRatio	pvalue	p.adjust	qvalue	KEGGID	Count	KEGGID(LOG2FC)	RichFactor	URL	SecondClass	TopClass
mmu04713	Circadian entrainment	1/6	9/4294	0.0125172	0.0801165	0.0562221	C01598	1	C01598	79.52	https://www.kegg.jp/kegg-bin/show_pathway?map=mmu04713&multi_query=cpd:C01598+purple	Environmental adaptation	Organismal Systems
mmu01210	2-Oxocarboxylic acid metabolism	2/6	134/4294	0.0133527	0.0801165	0.0562221	C08417/C00417	2	C08417/C00417	10.68	https://www.kegg.jp/kegg-bin/show_pathway?map=mmu01210&multi_query=cpd:C08417+purple%0d%0acpd:C00417+purple	Global and overview maps	Metabolism
mmu00020	Citrate cycle (TCA cycle)	1/6	20/4294	0.0276385	0.110554	0.0775817	C00417	1	C00417	35.78	https://www.kegg.jp/kegg-bin/show_pathway?map=mmu00020&multi_query=cpd:C00417+purple	Carbohydrate metabolism	Metabolism
mmu00410	beta-Alanine metabolism	1/6	32/4294	0.0439138	0.116673	0.0818759	C00383	1	C00383	22.36	https://www.kegg.jp/kegg-bin/show_pathway?map=mmu00410&multi_query=cpd:C00383+purple	Metabolism of other amino acids	Metabolism
mmu00340	Histidine metabolism	1/6	47/4294	0.0639382	0.116673	0.0818759	C01152	1	C01152	15.23	https://www.kegg.jp/kegg-bin/show_pathway?map=mmu00340&multi_query=cpd:C01152+purple	Amino acid metabolism	Metabolism
mmu04080	Neuroactive ligand-receptor interaction	1/6	52/4294	0.0705348	0.116673	0.0818759	C01598	1	C01598	13.76	https://www.kegg.jp/kegg-bin/show_pathway?map=mmu04080&multi_query=cpd:C01598+purple	Signaling molecules and interaction	Environmental Information Processing
mmu00061	Fatty acid biosynthesis	1/6	58/4294	0.0783996	0.116673	0.0818759	C00383	1	C00383	12.34	https://www.kegg.jp/kegg-bin/show_pathway?map=mmu00061&multi_query=cpd:C00383+purple	Lipid metabolism	Metabolism
mmu00630	Glyoxylate and dicarboxylate metabolism	1/6	62/4294	0.0836118	0.116673	0.0818759	C00417	1	C00417	11.54	https://www.kegg.jp/kegg-bin/show_pathway?map=mmu00630&multi_query=cpd:C00417+purple	Carbohydrate metabolism	Metabolism
mmu00240	Pyrimidine metabolism	1/6	65/4294	0.0875049	0.116673	0.0818759	C00383	1	C00383	11.01	https://www.kegg.jp/kegg-bin/show_pathway?map=mmu00240&multi_query=cpd:C00383+purple	Nucleotide metabolism	Metabolism
mmu00380	Tryptophan metabolism	1/6	83/4294	0.110575	0.13269	0.0931159	C01598	1	C01598	8.62	https://www.kegg.jp/kegg-bin/show_pathway?map=mmu00380&multi_query=cpd:C01598+purple	Amino acid metabolism	Metabolism
mmu00230	Purine metabolism	1/6	95/4294	0.125684	0.137109	0.0962171	C00362	1	C00362	7.53	https://www.kegg.jp/kegg-bin/show_pathway?map=mmu00230&multi_query=cpd:C00362+purple	Nucleotide metabolism	Metabolism
mmu01212	Fatty acid metabolism	1/6	122/4294	0.158897	0.158897	0.111507	C00383	1	C00383	5.87	https://www.kegg.jp/kegg-bin/show_pathway?map=mmu01212&multi_query=cpd:C00383+purple	Global and overview maps	Metabolism
